# Supplementary material for: Evaluating the power and limitations of genome-wide association studies in Caenorhabditis elegans
Source: PubMed Central journal article supplement (PMC9258552; doi:10.1093/g3journal/jkac114), 2022-05-10
Supplement: jkac114_supplementary_data.pdf [file jkac114_supplementary_data.pdf]

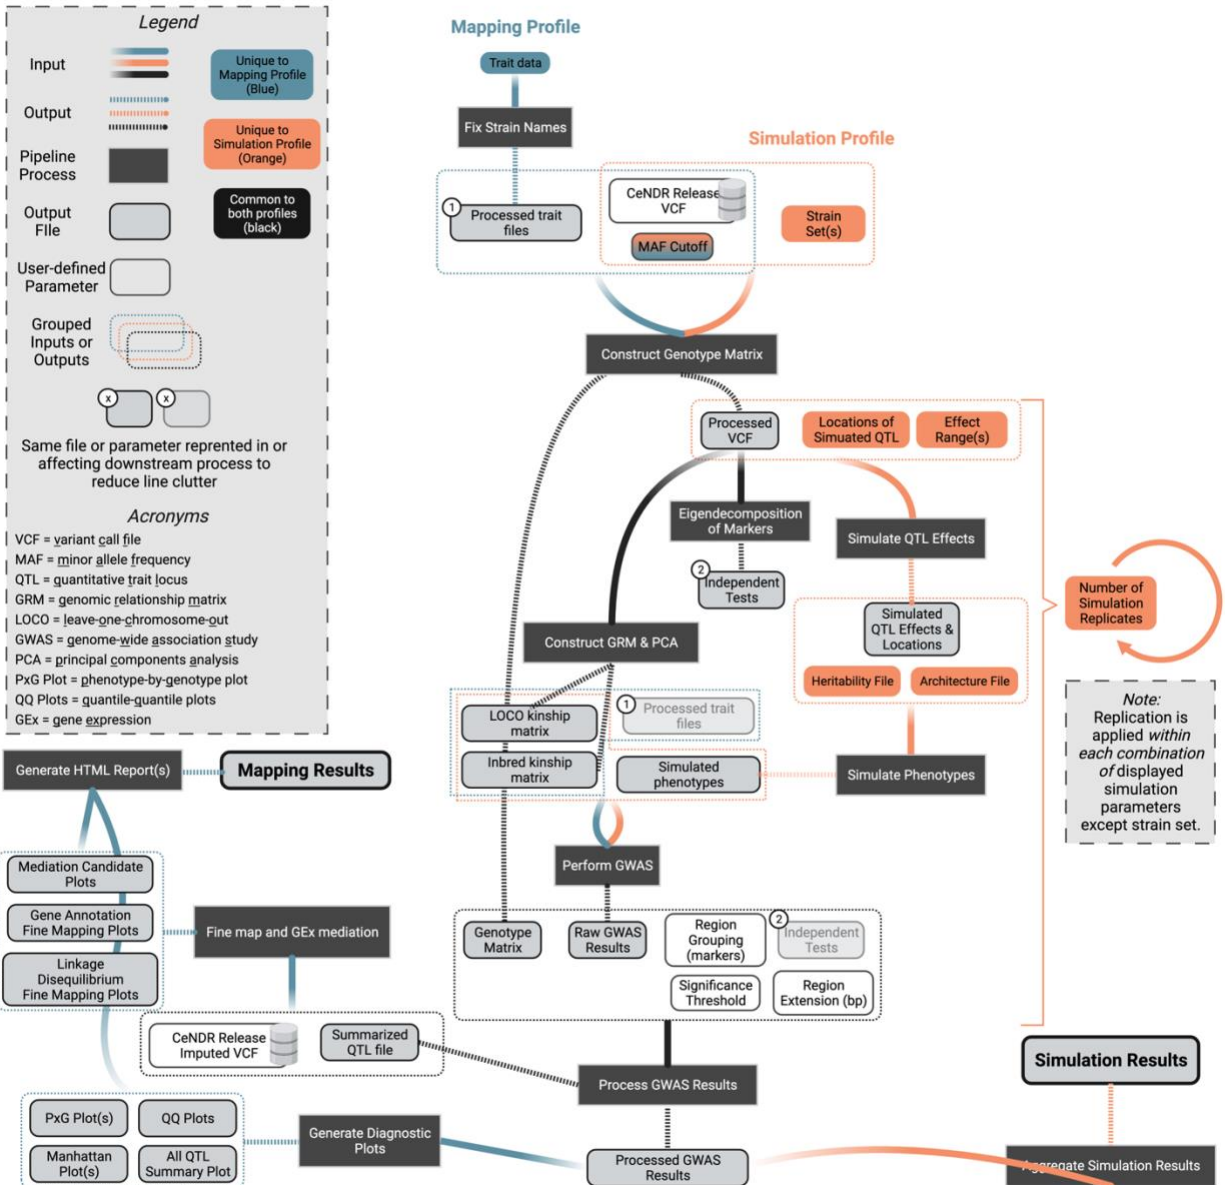

Supplemental Figure 1: Flowchart describing inputs, outputs, and processes in the mapping and simulation profiles of NemaScan.

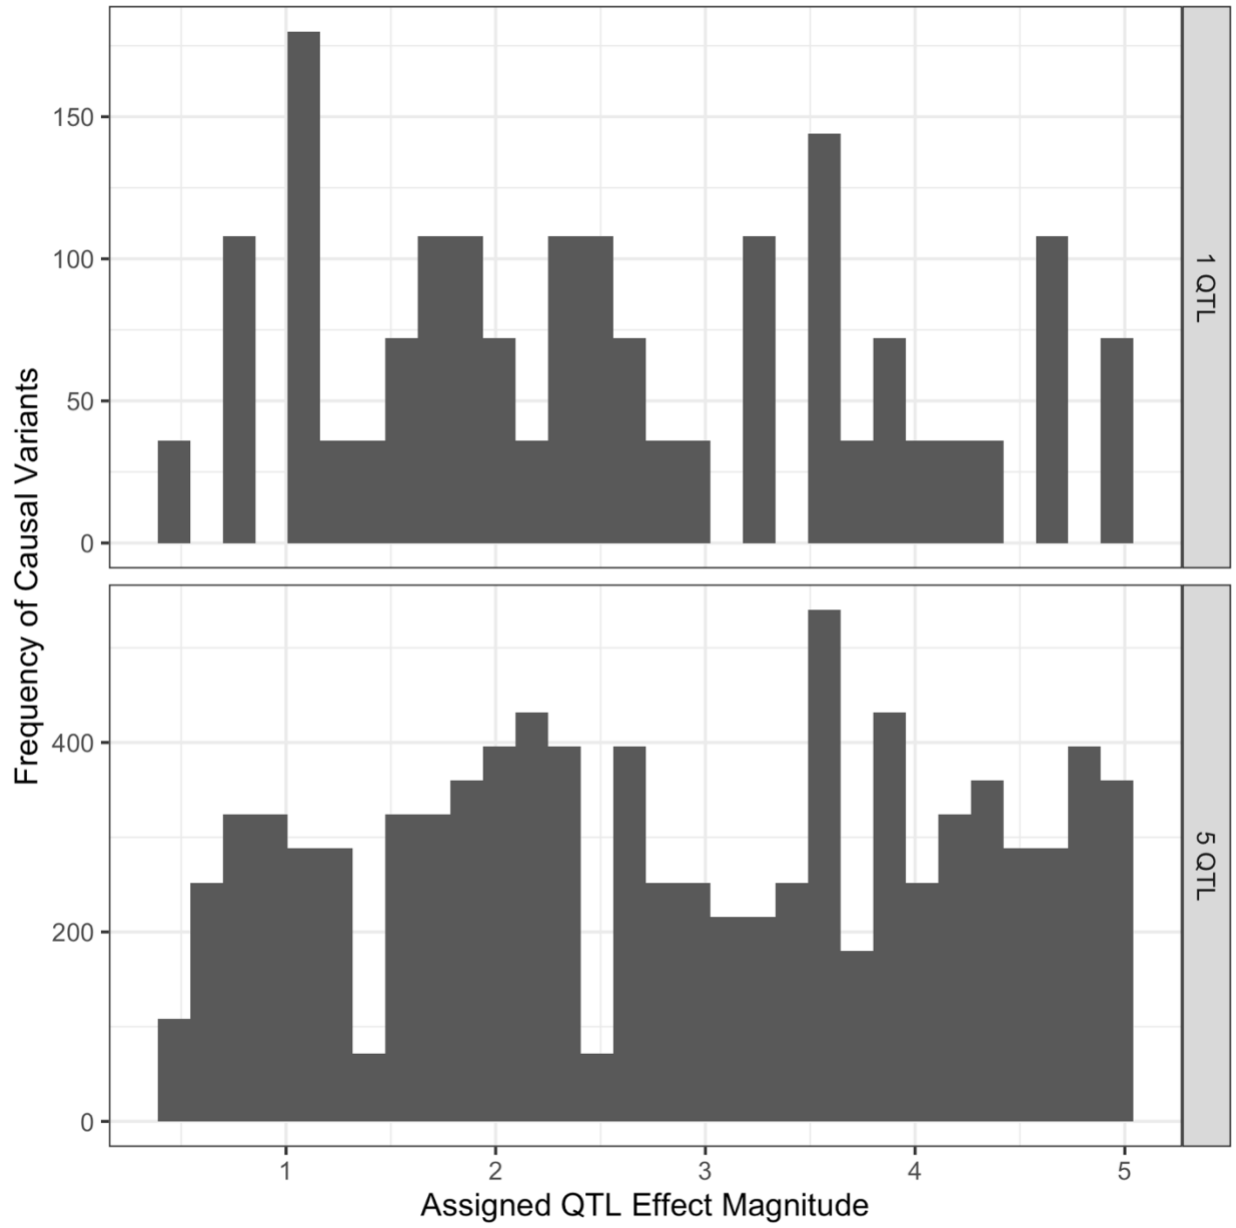

Supplemental Figure 2: Effect size distribution of simulations comparing algorithm performance

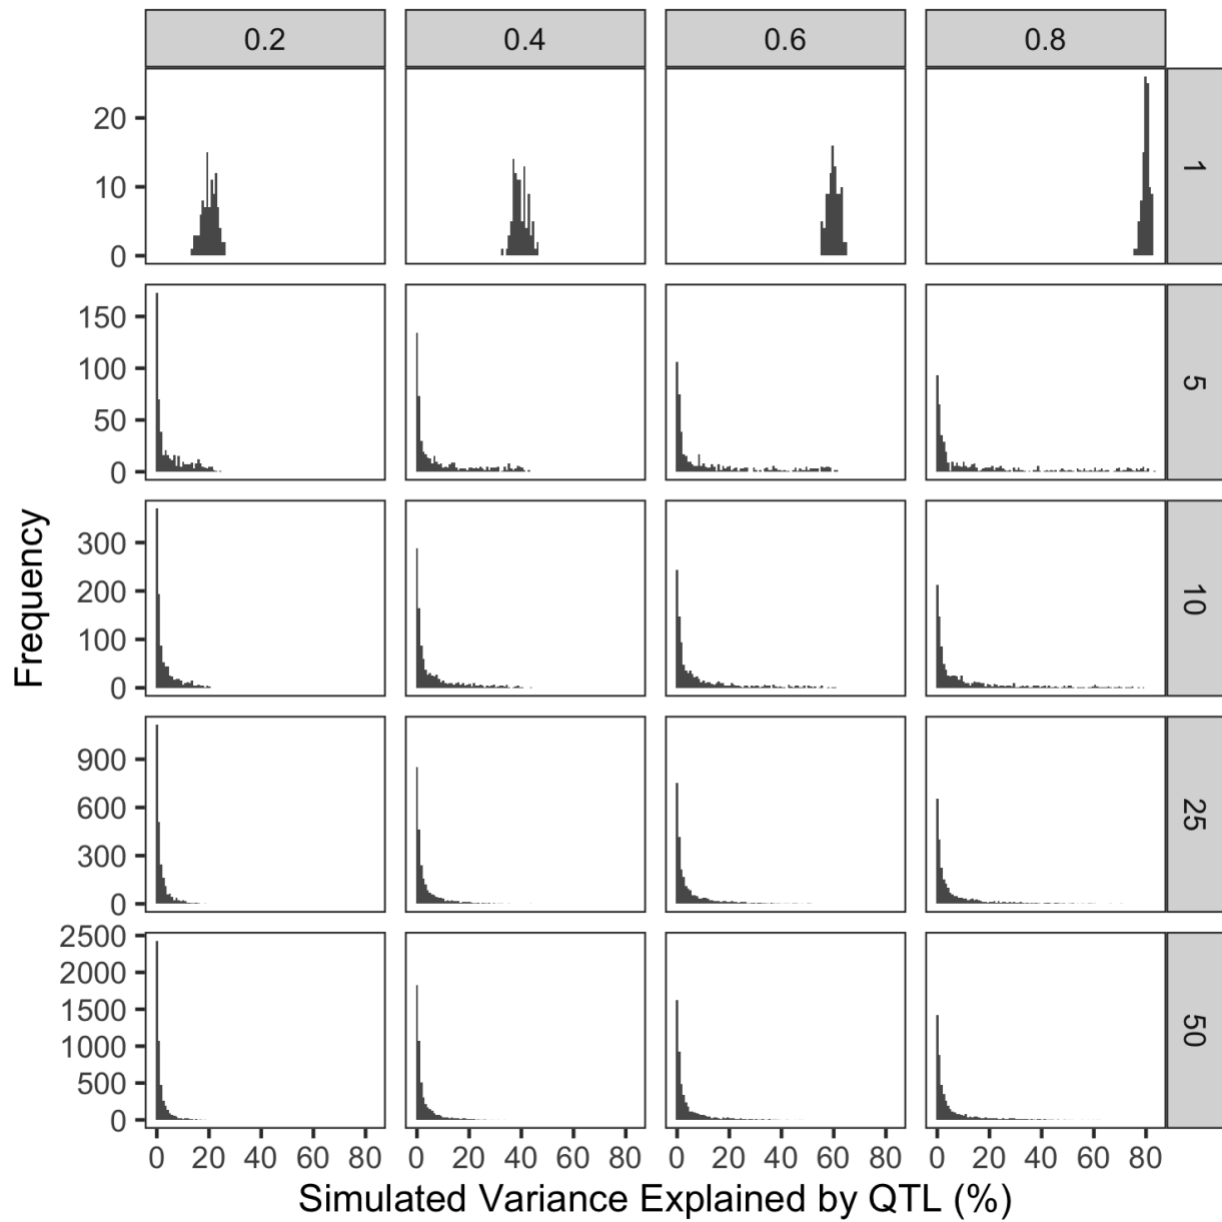

Supplemental Figure 3: Distributions of simulated QTL effects expressed as the fraction of phenotypic variance explained. Horizontal panels denote the number of simulated QTL per trait and vertical panels denote the heritability of each simulated trait.

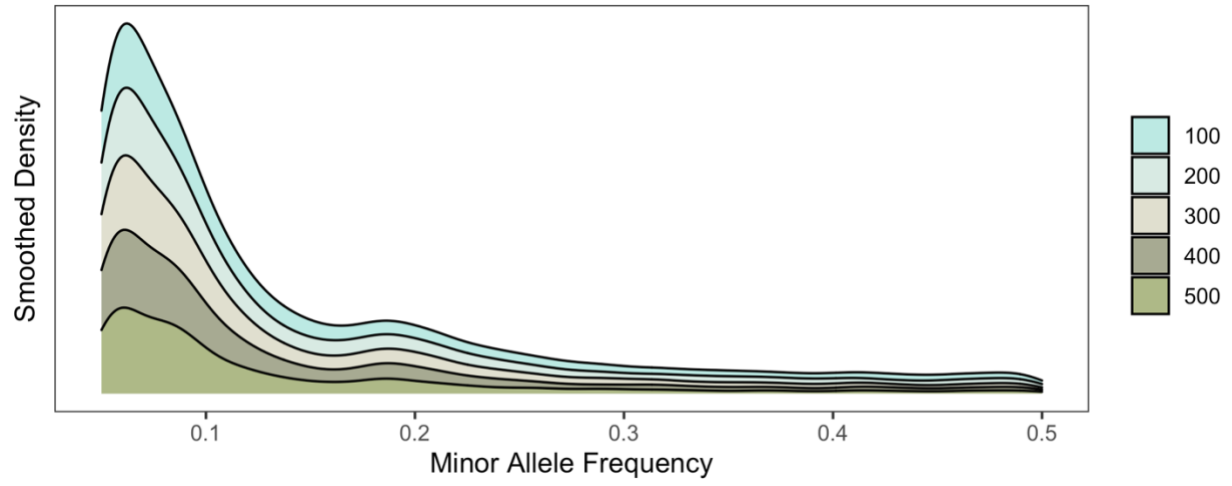

Supplemental Figure 4: Distributions of all simulated QTL minor allele frequencies among mapping populations of increasing size

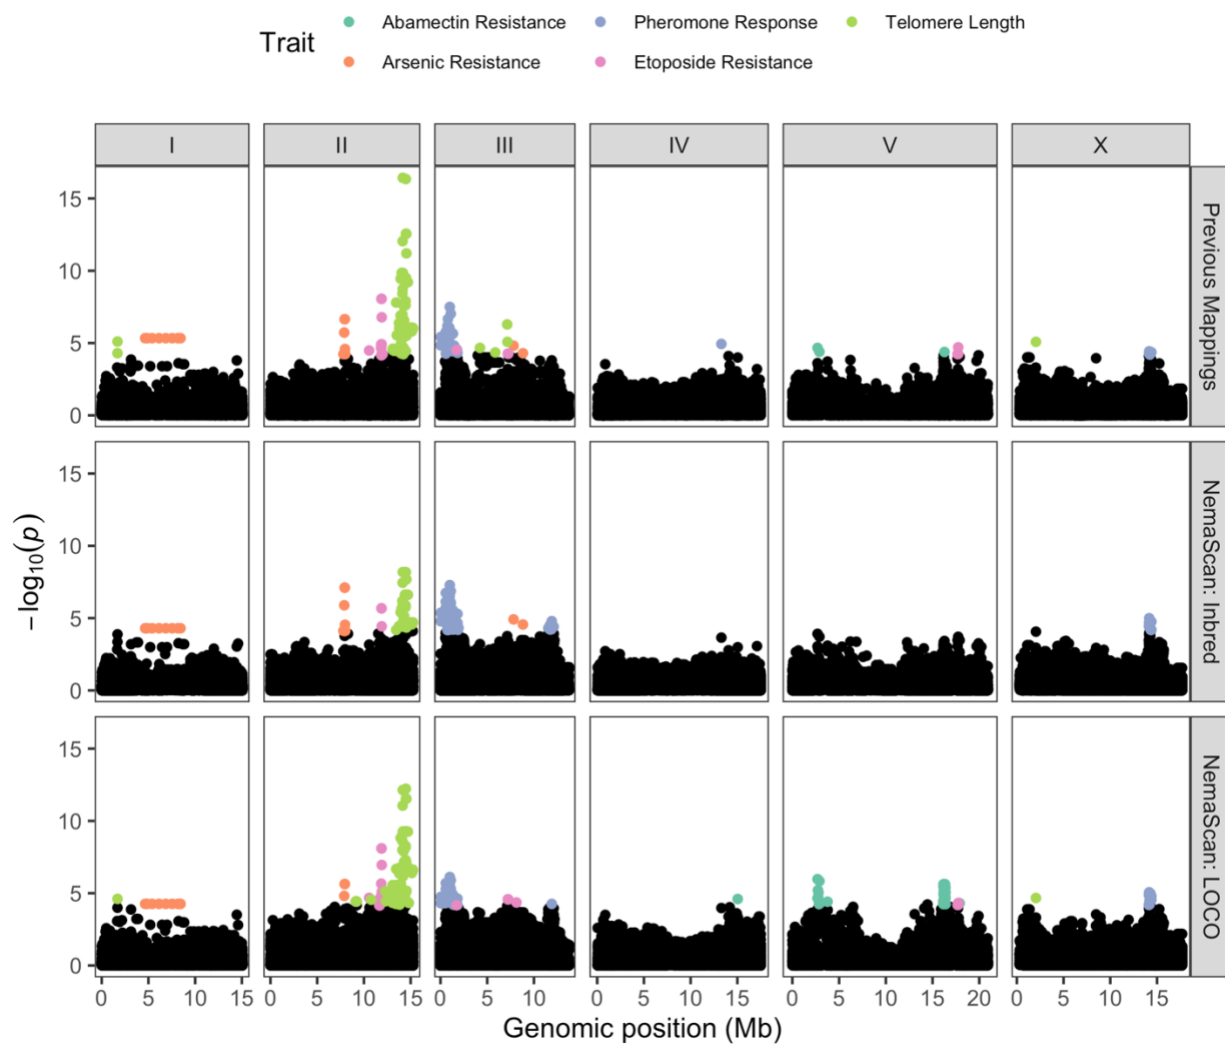

Supplemental Figure 5: Manhattan plots of previous GWA mappings and NemaScan mappings. Markers exceeding the multiple testing correction threshold are colored according to the mapped trait of interest.

| Figure   | Number of Simulated QTL per Trait | Trait Heritability (h <sup>2</sup> )              | Effect Distribution | Strain Set                                                                                                        | Number of Strains          | Simulated QTL Locations                                                             | Grouping Replicated                                                                 | Approximate Replication per Group |
|----------|-----------------------------------|---------------------------------------------------|---------------------|-------------------------------------------------------------------------------------------------------------------|----------------------------|-------------------------------------------------------------------------------------|-------------------------------------------------------------------------------------|-----------------------------------|
| Figure 1 | 1; 5                              | 0.1; 0.2; 0.3;<br>0.4; 0.5; 0.6;<br>0.7; 0.8; 0.9 | 0.5-5               | Hahnel et. al. 2018                                                                                               | 203                        | Genome-wide                                                                         | Heritability x<br>Number of QTL                                                     | 50                                |
| Figure 2 | 1; 5; 10; 25; 50                  | 0.2; 0.4; 0.6; 0.8                                | Gamma (0.4,1.66)    | CeNDR Strains                                                                                                     | 540                        | Genome-wide                                                                         | Heritability x<br>Number of QTL                                                     | 100                               |
| Figure 3 | 5                                 | 0.8                                               | Gamma (0.4,1.66)    | Subsampled CeNDR Strains                                                                                          | 100; 200; 300;<br>400; 500 | Genome-wide                                                                         | Subsampled Population                                                               | 50                                |
| Figure 4 | 5                                 | 0.8                                               | Gamma (0.4,1.66)    | Swept<br>Subsampled<br>CeNDR Strains;<br>Divergent<br>Subsampled<br>CeNDR Strains;<br>Subsampled<br>CeNDR Strains | 144                        | Genome-wide                                                                         | Subsampled Population                                                               | 30                                |
| Figure 5 | 1                                 | 0.2; 0.5; 0.8                                     | Uniform             | All Divergent Strains; Select Swept Strains                                                                       | 183; 182                   | Chromosome-Specific Arms and Centers;<br>Population-specific hyperdivergent regions | Heritability x<br>Strain Set x<br>Chromosome Region x<br>Divergence x<br>Chromosome | 100                               |

Supplemental Table 1: Simulation summary

| Trait Heritability | Number of Simulated QTL | Group 1                  | Group 2                  | n1 | n2 | Adjusted p-value | Significance |
|--------------------|-------------------------|--------------------------|--------------------------|----|----|------------------|--------------|
| 0.1                | 1                       | EMMA                     | fastGWA-Imm-exact        | 50 | 50 | 1                | ns           |
| 0.1                | 1                       | EMMA                     | fastGWA-Imm-exact-INBRED | 50 | 50 | 1                | ns           |
| 0.1                | 1                       | EMMA                     | fastGWA-Imm-exact-LOCO   | 50 | 50 | 0.78223          | ns           |
| 0.1                | 1                       | fastGWA-Imm-exact        | fastGWA-Imm-exact-INBRED | 50 | 50 | 1                | ns           |
| 0.1                | 1                       | fastGWA-Imm-exact        | fastGWA-Imm-exact-LOCO   | 50 | 50 | 0.41072          | ns           |
| 0.1                | 1                       | fastGWA-Imm-exact-INBRED | fastGWA-Imm-exact-LOCO   | 50 | 50 | 0.78223          | ns           |
| 0.2                | 1                       | EMMA                     | fastGWA-Imm-exact        | 50 | 50 | 1                | ns           |
| 0.2                | 1                       | EMMA                     | fastGWA-Imm-exact-INBRED | 50 | 50 | 0.44228          | ns           |
| 0.2                | 1                       | EMMA                     | fastGWA-Imm-exact-LOCO   | 50 | 50 | 1                | ns           |
| 0.2                | 1                       | fastGWA-Imm-exact        | fastGWA-Imm-exact-INBRED | 50 | 50 | 1                | ns           |
| 0.2                | 1                       | fastGWA-Imm-exact        | fastGWA-Imm-exact-LOCO   | 50 | 50 | 1                | ns           |
| 0.2                | 1                       | fastGWA-Imm-exact-INBRED | fastGWA-Imm-exact-LOCO   | 50 | 50 | 0.76257          | ns           |
| 0.3                | 1                       | EMMA                     | fastGWA-Imm-exact        | 50 | 50 | 1                | ns           |
| 0.3                | 1                       | EMMA                     | fastGWA-Imm-exact-INBRED | 50 | 50 | 0.60446          | ns           |
| 0.3                | 1                       | EMMA                     | fastGWA-Imm-exact-LOCO   | 50 | 50 | 1                | ns           |
| 0.3                | 1                       | fastGWA-Imm-exact        | fastGWA-Imm-exact-INBRED | 50 | 50 | 1                | ns           |
| 0.3                | 1                       | fastGWA-Imm-exact        | fastGWA-Imm-exact-LOCO   | 50 | 50 | 1                | ns           |
| 0.3                | 1                       | fastGWA-Imm-exact-INBRED | fastGWA-Imm-exact-LOCO   | 50 | 50 | 0.60446          | ns           |
| 0.1                | 5                       | EMMA                     | fastGWA-Imm-exact        | 50 | 50 | 1                | ns           |
| 0.1                | 5                       | EMMA                     | fastGWA-Imm-exact-INBRED | 50 | 50 | 1                | ns           |
| 0.1                | 5                       | EMMA                     | fastGWA-Imm-exact-LOCO   | 50 | 50 | 1                | ns           |
| 0.1                | 5                       | fastGWA-Imm-exact        | fastGWA-Imm-exact-INBRED | 50 | 50 | 1                | ns           |
| 0.1                | 5                       | fastGWA-Imm-exact        | fastGWA-Imm-exact-LOCO   | 50 | 50 | 1                | ns           |
| 0.1                | 5                       | fastGWA-Imm-exact-INBRED | fastGWA-Imm-exact-LOCO   | 50 | 50 | 1                | ns           |
| 0.2                | 5                       | EMMA                     | fastGWA-Imm-exact        | 50 | 50 | 1                | ns           |
| 0.2                | 5                       | EMMA                     | fastGWA-Imm-exact-INBRED | 50 | 50 | 1                | ns           |
| 0.2                | 5                       | EMMA                     | fastGWA-Imm-exact-LOCO   | 50 | 50 | 1                | ns           |
| 0.2                | 5                       | fastGWA-Imm-exact        | fastGWA-Imm-exact-INBRED | 50 | 50 | 1                | ns           |
| 0.2                | 5                       | fastGWA-Imm-exact        | fastGWA-Imm-exact-LOCO   | 50 | 50 | 1                | ns           |
| 0.2                | 5                       | fastGWA-Imm-exact-INBRED | fastGWA-Imm-exact-LOCO   | 50 | 50 | 1                | ns           |
| 0.3                | 5                       | EMMA                     | fastGWA-Imm-exact        | 50 | 50 | 1                | ns           |
| 0.3                | 5                       | EMMA                     | fastGWA-Imm-exact-INBRED | 50 | 50 | 1                | ns           |
| 0.3                | 5                       | EMMA                     | fastGWA-Imm-exact-LOCO   | 50 | 50 | 1                | ns           |
| 0.3                | 5                       | fastGWA-Imm-exact        | fastGWA-Imm-exact-INBRED | 50 | 50 | 1                | ns           |
| 0.3                | 5                       | fastGWA-Imm-exact        | fastGWA-Imm-exact-LOCO   | 50 | 50 | 1                | ns           |
| 0.3                | 5                       | fastGWA-Imm-exact-INBRED | fastGWA-Imm-exact-LOCO   | 50 | 50 | 0.5337           | ns           |
| 0.3                | 5                       | fastGWA-Imm-exact-INBRED | fastGWA-Imm-exact-LOCO   | 50 | 50 | 0.5337           | ns           |
| 0.4                | 5                       | EMMA                     | fastGWA-Imm-exact        | 50 | 50 | 0.23146          | ns           |
| 0.4                | 5                       | EMMA                     | fastGWA-Imm-exact-INBRED | 50 | 50 | 0.65345          | ns           |
| 0.4                | 5                       | EMMA                     | fastGWA-Imm-exact-LOCO   | 50 | 50 | 0.3213           | ns           |
| 0.4                | 5                       | fastGWA-Imm-exact        | fastGWA-Imm-exact-INBRED | 50 | 50 | 0.3213           | ns           |
| 0.4                | 5                       | fastGWA-Imm-exact        | fastGWA-Imm-exact-LOCO   | 50 | 50 | 0.00271          | **           |
| 0.4                | 5                       | fastGWA-Imm-exact-INBRED | fastGWA-Imm-exact-LOCO   | 50 | 50 | 0.19683          | ns           |
| 0.5                | 5                       | EMMA                     | fastGWA-Imm-exact        | 50 | 50 | 0.00037          | ***          |
| 0.5                | 5                       | EMMA                     | fastGWA-Imm-exact-INBRED | 50 | 50 | 0.14917          | ns           |
| 0.5                | 5                       | EMMA                     | fastGWA-Imm-exact-LOCO   | 50 | 50 | 0.14917          | ns           |
| 0.5                | 5                       | fastGWA-Imm-exact        | fastGWA-Imm-exact-INBRED | 50 | 50 | 0.04479          | *            |
| 0.5                | 5                       | fastGWA-Imm-exact        | fastGWA-Imm-exact-LOCO   | 50 | 50 | 0                | ****         |
| 0.5                | 5                       | fastGWA-Imm-exact-INBRED | fastGWA-Imm-exact-LOCO   | 50 | 50 | 0.00369          | **           |
| 0.6                | 5                       | EMMA                     | fastGWA-Imm-exact        | 50 | 50 | 0                | ****         |
| 0.6                | 5                       | EMMA                     | fastGWA-Imm-exact-INBRED | 50 | 50 | 0.22415          | ns           |
| 0.6                | 5                       | EMMA                     | fastGWA-Imm-exact-LOCO   | 50 | 50 | 0.0589           | ns           |
| 0.6                | 5                       | fastGWA-Imm-exact        | fastGWA-Imm-exact-INBRED | 50 | 50 | 2.00E-04         | ***          |
| 0.6                | 5                       | fastGWA-Imm-exact        | fastGWA-Imm-exact-LOCO   | 50 | 50 | 0                | ****         |
| 0.6                | 5                       | fastGWA-Imm-exact-INBRED | fastGWA-Imm-exact-LOCO   | 50 | 50 | 0.00207          | **           |
| 0.7                | 5                       | EMMA                     | fastGWA-Imm-exact        | 50 | 50 | 0                | ****         |
| 0.7                | 5                       | EMMA                     | fastGWA-Imm-exact-INBRED | 50 | 50 | 0.48648          | ns           |
| 0.7                | 5                       | EMMA                     | fastGWA-Imm-exact-LOCO   | 50 | 50 | 0.06525          | ns           |
| 0.7                | 5                       | fastGWA-Imm-exact        | fastGWA-Imm-exact-INBRED | 50 | 50 | 6.00E-05         | ****         |
| 0.7                | 5                       | fastGWA-Imm-exact        | fastGWA-Imm-exact-LOCO   | 50 | 50 | 0                | ****         |
| 0.7                | 5                       | fastGWA-Imm-exact-INBRED | fastGWA-Imm-exact-LOCO   | 50 | 50 | 0.01385          | *            |
| 0.8                | 5                       | EMMA                     | fastGWA-Imm-exact        | 50 | 50 | 0                | ****         |
| 0.8                | 5                       | EMMA                     | fastGWA-Imm-exact-INBRED | 50 | 50 | 0.9322           | ns           |
| 0.8                | 5                       | EMMA                     | fastGWA-Imm-exact-LOCO   | 50 | 50 | 0.00826          | **           |
| 0.8                | 5                       | fastGWA-Imm-exact        | fastGWA-Imm-exact-INBRED | 50 | 50 | 0                | ****         |
| 0.8                | 5                       | fastGWA-Imm-exact        | fastGWA-Imm-exact-LOCO   | 50 | 50 | 0                | ****         |
| 0.8                | 5                       | fastGWA-Imm-exact-INBRED | fastGWA-Imm-exact-LOCO   | 50 | 50 | 0.00826          | **           |
| 0.9                | 5                       | EMMA                     | fastGWA-Imm-exact        | 50 | 50 | 0                | ****         |
| 0.9                | 5                       | EMMA                     | fastGWA-Imm-exact-INBRED | 50 | 50 | 0.27572          | ns           |
| 0.9                | 5                       | EMMA                     | fastGWA-Imm-exact-LOCO   | 50 | 50 | 0.00501          | **           |
| 0.9                | 5                       | fastGWA-Imm-exact        | fastGWA-Imm-exact-INBRED | 50 | 50 | 3.00E-05         | ****         |
| 0.9                | 5                       | fastGWA-Imm-exact        | fastGWA-Imm-exact-LOCO   | 50 | 50 | 0                | ****         |
| 0.9                | 5                       | fastGWA-Imm-exact-INBRED | fastGWA-Imm-exact-LOCO   | 50 | 50 | 0.00012          | ***          |

Supplemental Table 2: Differences in power to detect QTL between mapping algorithms at increasing heritability for one and five underlying QTL

| Trait | Heritab | Number of S | Group 1    | Group 2 | n1 | n2 | Adjusted p-v | Significance |
|-------|---------|-------------|------------|---------|----|----|--------------|--------------|
| 0.1   | 1       | EMMA        | fastGWA-lm |         | 24 | 27 | 1            | ns           |
| 0.1   | 1       | EMMA        | fastGWA-lm |         | 24 | 25 | 1            | ns           |
| 0.1   | 1       | EMMA        | fastGWA-lm |         | 24 | 21 | 1            | ns           |
| 0.1   | 1       | fastGWA-lm  | fastGWA-lm |         | 27 | 25 | 1            | ns           |
| 0.1   | 1       | fastGWA-lm  | fastGWA-lm |         | 27 | 21 | 1            | ns           |
| 0.1   | 1       | fastGWA-lm  | fastGWA-lm |         | 25 | 21 | 1            | ns           |
| 0.2   | 1       | EMMA        | fastGWA-lm |         | 48 | 47 | 0.02171      | *            |
| 0.2   | 1       | EMMA        | fastGWA-lm |         | 48 | 44 | 0.69477      | ns           |
| 0.2   | 1       | EMMA        | fastGWA-lm |         | 48 | 47 | 0.69477      | ns           |
| 0.2   | 1       | fastGWA-lm  | fastGWA-lm |         | 47 | 44 | 0.07299      | ns           |
| 0.2   | 1       | fastGWA-lm  | fastGWA-lm |         | 47 | 47 | 0.00097      | ***          |
| 0.2   | 1       | fastGWA-lm  | fastGWA-lm |         | 44 | 47 | 0.5322       | ns           |
| 0.3   | 1       | EMMA        | fastGWA-lm |         | 50 | 49 | 0.6066       | ns           |
| 0.3   | 1       | EMMA        | fastGWA-lm |         | 50 | 48 | 0.12139      | ns           |
| 0.3   | 1       | EMMA        | fastGWA-lm |         | 50 | 50 | 0.00282      | **           |
| 0.3   | 1       | fastGWA-lm  | fastGWA-lm |         | 49 | 48 | 0.6066       | ns           |
| 0.3   | 1       | fastGWA-lm  | fastGWA-lm |         | 49 | 50 | 0.12139      | ns           |
| 0.3   | 1       | fastGWA-lm  | fastGWA-lm |         | 48 | 50 | 0.6066       | ns           |
| 0.4   | 1       | EMMA        | fastGWA-lm |         | 50 | 50 | 1            | ns           |
| 0.4   | 1       | EMMA        | fastGWA-lm |         | 50 | 50 | 1            | ns           |
| 0.4   | 1       | EMMA        | fastGWA-lm |         | 50 | 50 | 1            | ns           |
| 0.4   | 1       | fastGWA-lm  | fastGWA-lm |         | 50 | 50 | 1            | ns           |
| 0.4   | 1       | fastGWA-lm  | fastGWA-lm |         | 50 | 50 | 1            | ns           |
| 0.4   | 1       | fastGWA-lm  | fastGWA-lm |         | 50 | 50 | 1            | ns           |
| 0.5   | 1       | EMMA        | fastGWA-lm |         | 50 | 50 | 0.01141      | *            |
| 0.5   | 1       | EMMA        | fastGWA-lm |         | 50 | 50 | 0.01141      | *            |
| 0.5   | 1       | EMMA        | fastGWA-lm |         | 50 | 50 | 0.01141      | *            |
| 0.5   | 1       | fastGWA-lm  | fastGWA-lm |         | 50 | 50 | 1            | ns           |
| 0.5   | 1       | fastGWA-lm  | fastGWA-lm |         | 50 | 50 | 1            | ns           |
| 0.5   | 1       | fastGWA-lm  | fastGWA-lm |         | 50 | 50 | 1            | ns           |
| 0.6   | 1       | EMMA        | fastGWA-lm |         | 50 | 50 | 0.11581      | ns           |
| 0.6   | 1       | EMMA        | fastGWA-lm |         | 50 | 50 | 0.36002      | ns           |
| 0.6   | 1       | EMMA        | fastGWA-lm |         | 50 | 50 | 1            | ns           |
| 0.6   | 1       | fastGWA-lm  | fastGWA-lm |         | 50 | 50 | 1            | ns           |
| 0.6   | 1       | fastGWA-lm  | fastGWA-lm |         | 50 | 50 | 0.1332       | ns           |
| 0.6   | 1       | fastGWA-lm  | fastGWA-lm |         | 50 | 50 | 0.36002      | ns           |
| 0.7   | 1       | EMMA        | fastGWA-lm |         | 50 | 50 | 0.04518      | *            |
| 0.7   | 1       | EMMA        | fastGWA-lm |         | 50 | 50 | 0.07324      | ns           |
| 0.7   | 1       | EMMA        | fastGWA-lm |         | 50 | 50 | 1            | ns           |
| 0.7   | 1       | fastGWA-lm  | fastGWA-lm |         | 50 | 50 | 1            | ns           |
| 0.7   | 1       | fastGWA-lm  | fastGWA-lm |         | 50 | 50 | 0.02181      | *            |
| 0.7   | 1       | fastGWA-lm  | fastGWA-lm |         | 50 | 50 | 0.04518      | *            |
| 0.8   | 1       | EMMA        | fastGWA-lm |         | 50 | 50 | 0.10115      | ns           |
| 0.8   | 1       | EMMA        | fastGWA-lm |         | 50 | 50 | 0.60209      | ns           |
| 0.8   | 1       | EMMA        | fastGWA-lm |         | 50 | 50 | 0.60209      | ns           |
| 0.8   | 1       | fastGWA-lm  | fastGWA-lm |         | 50 | 50 | 0.59338      | ns           |
| 0.8   | 1       | fastGWA-lm  | fastGWA-lm |         | 50 | 50 | 0.0077       | **           |
| 0.8   | 1       | fastGWA-lm  | fastGWA-lm |         | 50 | 50 | 0.21354      | ns           |
| 0.9   | 1       | EMMA        | fastGWA-lm |         | 50 | 50 | 0.19981      | ns           |
| 0.9   | 1       | EMMA        | fastGWA-lm |         | 50 | 50 | 1            | ns           |
| 0.9   | 1       | EMMA        | fastGWA-lm |         | 50 | 50 | 0.26486      | ns           |
| 0.9   | 1       | fastGWA-lm  | fastGWA-lm |         | 50 | 50 | 0.19981      | ns           |
| 0.9   | 1       | fastGWA-lm  | fastGWA-lm |         | 50 | 50 | 0.00103      | **           |
| 0.9   | 1       | fastGWA-lm  | fastGWA-lm |         | 50 | 50 | 0.26486      | ns           |
| 0.1   | 5       | EMMA        | fastGWA-lm |         | 6  | 10 | 1            | ns           |
| 0.1   | 5       | EMMA        | fastGWA-lm |         | 6  | 8  | 1            | ns           |
| 0.1   | 5       | EMMA        | fastGWA-lm |         | 6  | 2  | 1            | ns           |
| 0.1   | 5       | fastGWA-lm  | fastGWA-lm |         | 10 | 8  | 1            | ns           |
| 0.1   | 5       | fastGWA-lm  | fastGWA-lm |         | 10 | 2  | 1            | ns           |
| 0.1   | 5       | fastGWA-lm  | fastGWA-lm |         | 8  | 2  | 1            | ns           |
| 0.2   | 5       | EMMA        | fastGWA-lm |         | 22 | 31 | 1            | ns           |
| 0.2   | 5       | EMMA        | fastGWA-lm |         | 22 | 24 | 1            | ns           |
| 0.2   | 5       | EMMA        | fastGWA-lm |         | 22 | 19 | 1            | ns           |
| 0.2   | 5       | fastGWA-lm  | fastGWA-lm |         | 31 | 24 | 1            | ns           |
| 0.2   | 5       | fastGWA-lm  | fastGWA-lm |         | 31 | 19 | 0.67035      | ns           |
| 0.2   | 5       | fastGWA-lm  | fastGWA-lm |         | 24 | 19 | 1            | ns           |
| 0.3   | 5       | EMMA        | fastGWA-lm |         | 36 | 32 | 0.95233      | ns           |
| 0.3   | 5       | EMMA        | fastGWA-lm |         | 36 | 34 | 1            | ns           |
| 0.3   | 5       | EMMA        | fastGWA-lm |         | 36 | 42 | 1            | ns           |
| 0.3   | 5       | fastGWA-lm  | fastGWA-lm |         | 32 | 34 | 0.95233      | ns           |
| 0.3   | 5       | fastGWA-lm  | fastGWA-lm |         | 32 | 42 | 0.17422      | ns           |
| 0.3   | 5       | fastGWA-lm  | fastGWA-lm |         | 34 | 42 | 1            | ns           |
| 0.4   | 5       | EMMA        | fastGWA-lm |         | 45 | 34 | 1            | ns           |
| 0.4   | 5       | EMMA        | fastGWA-lm |         | 45 | 40 | 1            | ns           |
| 0.4   | 5       | EMMA        | fastGWA-lm |         | 45 | 49 | 1            | ns           |
| 0.4   | 5       | fastGWA-lm  | fastGWA-lm |         | 34 | 40 | 1            | ns           |
| 0.4   | 5       | fastGWA-lm  | fastGWA-lm |         | 34 | 49 | 1            | ns           |
| 0.4   | 5       | fastGWA-lm  | fastGWA-lm |         | 40 | 49 | 1            | ns           |
| 0.5   | 5       | EMMA        | fastGWA-lm |         | 49 | 38 | 1            | ns           |
| 0.5   | 5       | EMMA        | fastGWA-lm |         | 49 | 46 | 1            | ns           |
| 0.5   | 5       | EMMA        | fastGWA-lm |         | 49 | 50 | 1            | ns           |
| 0.5   | 5       | fastGWA-lm  | fastGWA-lm |         | 38 | 46 | 1            | ns           |
| 0.5   | 5       | fastGWA-lm  | fastGWA-lm |         | 38 | 50 | 1            | ns           |
| 0.5   | 5       | fastGWA-lm  | fastGWA-lm |         | 46 | 50 | 1            | ns           |
| 0.6   | 5       | EMMA        | fastGWA-lm |         | 49 | 40 | 0.69605      | ns           |
| 0.6   | 5       | EMMA        | fastGWA-lm |         | 49 | 50 | 0.796        | ns           |
| 0.6   | 5       | EMMA        | fastGWA-lm |         | 49 | 50 | 0.20467      | ns           |
| 0.6   | 5       | fastGWA-lm  | fastGWA-lm |         | 40 | 50 | 0.796        | ns           |
| 0.6   | 5       | fastGWA-lm  | fastGWA-lm |         | 40 | 50 | 0.0138       | *            |
| 0.6   | 5       | fastGWA-lm  | fastGWA-lm |         | 50 | 50 | 0.02481      | *            |
| 0.7   | 5       | EMMA        | fastGWA-lm |         | 50 | 44 | 1            | ns           |
| 0.7   | 5       | EMMA        | fastGWA-lm |         | 50 | 50 | 1            | ns           |
| 0.7   | 5       | EMMA        | fastGWA-lm |         | 50 | 50 | 1            | ns           |
| 0.7   | 5       | fastGWA-lm  | fastGWA-lm |         | 44 | 50 | 1            | ns           |
| 0.7   | 5       | fastGWA-lm  | fastGWA-lm |         | 44 | 50 | 0.32848      | ns           |
| 0.7   | 5       | fastGWA-lm  | fastGWA-lm |         | 50 | 50 | 1            | ns           |
| 0.8   | 5       | EMMA        | fastGWA-lm |         | 50 | 46 | 0.28505      | ns           |
| 0.8   | 5       | EMMA        | fastGWA-lm |         | 50 | 50 | 0.77132      | ns           |
| 0.8   | 5       | EMMA        | fastGWA-lm |         | 50 | 50 | 0.87436      | ns           |
| 0.8   | 5       | fastGWA-lm  | fastGWA-lm |         | 46 | 50 | 0.87436      | ns           |
| 0.8   | 5       | fastGWA-lm  | fastGWA-lm |         | 46 | 50 | 0.04972      | *            |
| 0.8   | 5       | fastGWA-lm  | fastGWA-lm |         | 50 | 50 | 0.28505      | ns           |
| 0.9   | 5       | EMMA        | fastGWA-lm |         | 50 | 48 | 0.77541      | ns           |
| 0.9   | 5       | EMMA        | fastGWA-lm |         | 50 | 50 | 0.77541      | ns           |
| 0.9   | 5       | EMMA        | fastGWA-lm |         | 50 | 50 | 0.44219      | ns           |
| 0.9   | 5       | fastGWA-lm  | fastGWA-lm |         | 48 | 50 | 0.74062      | ns           |
| 0.9   | 5       | fastGWA-lm  | fastGWA-lm |         | 48 | 50 | 0.06463      | ns           |
| 0.9   | 5       | fastGWA-lm  | fastGWA-lm |         | 50 | 50 | 0.74062      | ns           |

Supplemental Table 3: Differences in empirical FDR between mapping algorithms at increasing heritability for one and five underlying QTL



| Sample Size | 0-2.5       | 2.5-5       | 5-7.5       | 7.5-10      | 10-20       | 20-30       | 30-40       | 40-50       | 50-60       | 60-70       | 70-80       | 80-90       |
|-------------|-------------|-------------|-------------|-------------|-------------|-------------|-------------|-------------|-------------|-------------|-------------|-------------|
| 100         | 0.01 ± 0.01 | 0.02 ± 0.04 | 0.04 ± 0.05 | 0.07 ± 0.08 | 0.22 ± 0.07 | 0.45 ± 0.12 | 0.57 ± 0.14 | 0.73 ± 0.19 | 0.81 ± 0.14 | 0.85 ± 0.13 | 0.88 ± 0.11 | 0.91 ± 0.18 |
| 200         | 0.02 ± 0.02 | 0.06 ± 0.05 | 0.14 ± 0.08 | 0.2 ± 0.12  | 0.41 ± 0.1  | 0.53 ± 0.13 | 0.67 ± 0.16 | 0.75 ± 0.14 | 0.86 ± 0.12 | 0.92 ± 0.09 | 0.95 ± 0.07 | 0.94 ± 0.18 |
| 300         | 0.03 ± 0.02 | 0.12 ± 0.06 | 0.23 ± 0.12 | 0.36 ± 0.17 | 0.48 ± 0.1  | 0.64 ± 0.12 | 0.7 ± 0.15  | 0.82 ± 0.15 | 0.88 ± 0.1  | 0.93 ± 0.08 | 0.96 ± 0.06 | 0.96 ± 0.16 |
| 400         | 0.04 ± 0.02 | 0.15 ± 0.08 | 0.28 ± 0.13 | 0.43 ± 0.17 | 0.52 ± 0.13 | 0.68 ± 0.13 | 0.75 ± 0.13 | 0.85 ± 0.13 | 0.9 ± 0.1   | 0.94 ± 0.08 | 0.99 ± 0.03 | 0.99 ± 0.04 |
| 500         | 0.05 ± 0.02 | 0.18 ± 0.08 | 0.35 ± 0.13 | 0.49 ± 0.16 | 0.59 ± 0.12 | 0.69 ± 0.12 | 0.78 ± 0.14 | 0.86 ± 0.14 | 0.91 ± 0.11 | 0.96 ± 0.07 | 0.99 ± 0.03 | 1 ± 0       |

Supplemental Table 4: Average power to detect QTL explaining increasing phenotypic variance (% , columns) among subsampled populations of increasing sampling depth

| Population Type | 0-2.5       | 2.5-5       | 5-7.5       | 7.5-10      | 10-20       | 20-30       | 30-40       | 40-50       | 50-60       | 60-70       | 70-80       | 80-90       |
|-----------------|-------------|-------------|-------------|-------------|-------------|-------------|-------------|-------------|-------------|-------------|-------------|-------------|
| Divergent       | 0.01 ± 0.01 | 0.03 ± 0.03 | 0.07 ± 0.07 | 0.12 ± 0.1  | 0.28 ± 0.1  | 0.56 ± 0.11 | 0.75 ± 0.14 | 0.87 ± 0.12 | 0.92 ± 0.12 | 0.96 ± 0.07 | 0.97 ± 0.07 | 1 ± 0       |
| Subsampled      | 0.01 ± 0.02 | 0.04 ± 0.05 | 0.07 ± 0.07 | 0.15 ± 0.1  | 0.3 ± 0.1   | 0.52 ± 0.12 | 0.64 ± 0.13 | 0.75 ± 0.15 | 0.84 ± 0.13 | 0.88 ± 0.11 | 0.9 ± 0.08  | 0.93 ± 0.18 |
| Swept           | 0 ± 0       | 0.01 ± 0.02 | 0.04 ± 0.07 | 0.12 ± 0.11 | 0.44 ± 0.11 | 0.85 ± 0.09 | 0.98 ± 0.04 | 1 ± 0.02    | 0.99 ± 0.02 | 1 ± 0.01    | 1 ± 0       | 1 ± 0       |

Supplemental Table 5: Average power to detect QTL explaining increasing phenotypic variance (% , columns) among 144 randomly sampled divergent strains, 144 randomly sampled swept strains, and 144 randomly sampled strains from the overall CeNDR population

| Simulated Divergence | Simulated Chromosome Region | I        | II       | III      | IV       | V        | X        |
|----------------------|-----------------------------|----------|----------|----------|----------|----------|----------|
| Hyperdivergent       | Arm                         | 0.001170 | 0.028880 | 0.000680 | 0.037160 | 0.007740 | 0.075990 |
| Non-Hyperdivergent   | Arm                         | 0.062080 | 0.011320 | 0.000220 | 0.005160 | 0.020250 | 0.000460 |
| Hyperdivergent       | Center                      | 0.093920 | 0.191940 | 0.000000 | 0.002130 | 0.000730 | 0.001240 |
| Non-Hyperdivergent   | Center                      | 0.250980 | 0.005060 | 0.000030 | 0.002930 | 0.000000 | 0.003450 |
| Hyperdivergent       | Tip                         | 0.504990 | 0.595700 |          | 0.740690 | 0.497570 | 0.000010 |
| Non-Hyperdivergent   | Tip                         | 0.077100 | 0.614290 | 0.083260 | 0.063850 | 0.000110 | 0.016960 |

Supplemental Table 6: Differences in power to detect QTL between different chromosomes controlling for hyper-divergence and historic recombination groups (tips, arms, and centers)

| Strain Set       | Group 1                   | Group 2                   | n1   | n2   | Adjusted p-value | Significance |
|------------------|---------------------------|---------------------------|------|------|------------------|--------------|
| swept.chr.sims   | Hyperdivergent_Arm        | Hyperdivergent_Center     | 1859 | 1038 | 1                | ns           |
| swept.chr.sims   | Hyperdivergent_Arm        | Hyperdivergent_Tip        | 1859 | 700  | 1                | ns           |
| swept.chr.sims   | Hyperdivergent_Arm        | Non-Hyperdivergent_Arm    | 1859 | 1890 | 1                | ns           |
| swept.chr.sims   | Hyperdivergent_Arm        | Non-Hyperdivergent_Center | 1859 | 1009 | 0.69252          | ns           |
| swept.chr.sims   | Hyperdivergent_Arm        | Non-Hyperdivergent_Tip    | 1859 | 695  | 1                | ns           |
| swept.chr.sims   | Hyperdivergent_Center     | Hyperdivergent_Tip        | 1038 | 700  | 1                | ns           |
| swept.chr.sims   | Hyperdivergent_Center     | Non-Hyperdivergent_Arm    | 1038 | 1890 | 1                | ns           |
| swept.chr.sims   | Hyperdivergent_Center     | Non-Hyperdivergent_Center | 1038 | 1009 | 1                | ns           |
| swept.chr.sims   | Hyperdivergent_Center     | Non-Hyperdivergent_Tip    | 1038 | 695  | 1                | ns           |
| swept.chr.sims   | Hyperdivergent_Tip        | Non-Hyperdivergent_Arm    | 700  | 1890 | 1                | ns           |
| swept.chr.sims   | Hyperdivergent_Tip        | Non-Hyperdivergent_Center | 700  | 1009 | 1                | ns           |
| swept.chr.sims   | Hyperdivergent_Tip        | Non-Hyperdivergent_Tip    | 700  | 695  | 1                | ns           |
| swept.chr.sims   | Non-Hyperdivergent_Arm    | Non-Hyperdivergent_Center | 1890 | 1009 | 0.35341          | ns           |
| swept.chr.sims   | Non-Hyperdivergent_Arm    | Non-Hyperdivergent_Tip    | 1890 | 695  | 1                | ns           |
| swept.chr.sims   | Non-Hyperdivergent_Center | Non-Hyperdivergent_Tip    | 1009 | 695  | 1                | ns           |
| unswept.chr.sims | Hyperdivergent_Arm        | Hyperdivergent_Center     | 2030 | 1222 | 0                | ****         |
| unswept.chr.sims | Hyperdivergent_Arm        | Hyperdivergent_Tip        | 2030 | 344  | 1                | ns           |
| unswept.chr.sims | Hyperdivergent_Arm        | Non-Hyperdivergent_Arm    | 2030 | 2021 | 1                | ns           |
| unswept.chr.sims | Hyperdivergent_Arm        | Non-Hyperdivergent_Center | 2030 | 1285 | 0                | ****         |
| unswept.chr.sims | Hyperdivergent_Arm        | Non-Hyperdivergent_Tip    | 2030 | 291  | 0.6635           | ns           |
| unswept.chr.sims | Hyperdivergent_Center     | Hyperdivergent_Tip        | 1222 | 344  | 0.00147          | **           |
| unswept.chr.sims | Hyperdivergent_Center     | Non-Hyperdivergent_Arm    | 1222 | 2021 | 0                | ****         |
| unswept.chr.sims | Hyperdivergent_Center     | Non-Hyperdivergent_Center | 1222 | 1285 | 0.21109          | ns           |
| unswept.chr.sims | Hyperdivergent_Center     | Non-Hyperdivergent_Tip    | 1222 | 291  | 0.6635           | ns           |
| unswept.chr.sims | Hyperdivergent_Tip        | Non-Hyperdivergent_Arm    | 344  | 2021 | 1                | ns           |
| unswept.chr.sims | Hyperdivergent_Tip        | Non-Hyperdivergent_Center | 344  | 1285 | 0                | ****         |
| unswept.chr.sims | Hyperdivergent_Tip        | Non-Hyperdivergent_Tip    | 344  | 291  | 0.62177          | ns           |
| unswept.chr.sims | Non-Hyperdivergent_Arm    | Non-Hyperdivergent_Center | 2021 | 1285 | 0                | ****         |
| unswept.chr.sims | Non-Hyperdivergent_Arm    | Non-Hyperdivergent_Tip    | 2021 | 291  | 0.6635           | ns           |
| unswept.chr.sims | Non-Hyperdivergent_Center | Non-Hyperdivergent_Tip    | 1285 | 291  | 0.03955          | *            |

Supplemental Table 7: Power to detect simulated in hyper-divergent regions or different parts of the chromosome within the mapping populations

| Trait Heritability | Strain Set       | Group 1                   | Group 2                   | n1  | n2  | Adjusted p-value | Significance |
|--------------------|------------------|---------------------------|---------------------------|-----|-----|------------------|--------------|
| 0.2                | swept.chr.sims   | Hyperdivergent_Arm        | Hyperdivergent_Center     | 604 | 350 |                  | 1 ns         |
| 0.2                | swept.chr.sims   | Hyperdivergent_Arm        | Hyperdivergent_Tip        | 604 | 235 |                  | 1 ns         |
| 0.2                | swept.chr.sims   | Hyperdivergent_Arm        | Non-Hyperdivergent_Arm    | 604 | 618 |                  | 1 ns         |
| 0.2                | swept.chr.sims   | Hyperdivergent_Arm        | Non-Hyperdivergent_Center | 604 | 326 |                  | 1 ns         |
| 0.2                | swept.chr.sims   | Hyperdivergent_Arm        | Non-Hyperdivergent_Tip    | 604 | 242 | 0.44771          | ns           |
| 0.2                | swept.chr.sims   | Hyperdivergent_Center     | Hyperdivergent_Tip        | 350 | 235 |                  | 1 ns         |
| 0.2                | swept.chr.sims   | Hyperdivergent_Center     | Non-Hyperdivergent_Arm    | 350 | 618 |                  | 1 ns         |
| 0.2                | swept.chr.sims   | Hyperdivergent_Center     | Non-Hyperdivergent_Center | 350 | 326 |                  | 1 ns         |
| 0.2                | swept.chr.sims   | Hyperdivergent_Center     | Non-Hyperdivergent_Tip    | 350 | 242 | 0.48932          | ns           |
| 0.2                | swept.chr.sims   | Hyperdivergent_Tip        | Non-Hyperdivergent_Arm    | 235 | 618 |                  | 1 ns         |
| 0.2                | swept.chr.sims   | Hyperdivergent_Tip        | Non-Hyperdivergent_Center | 235 | 326 | 0.31217          | ns           |
| 0.2                | swept.chr.sims   | Hyperdivergent_Tip        | Non-Hyperdivergent_Tip    | 235 | 242 |                  | 1 ns         |
| 0.2                | swept.chr.sims   | Non-Hyperdivergent_Arm    | Non-Hyperdivergent_Center | 618 | 326 | 0.31217          | ns           |
| 0.2                | swept.chr.sims   | Non-Hyperdivergent_Arm    | Non-Hyperdivergent_Tip    | 618 | 242 |                  | 1 ns         |
| 0.2                | swept.chr.sims   | Non-Hyperdivergent_Center | Non-Hyperdivergent_Tip    | 326 | 242 | 0.02386          | *            |
| 0.2                | unswept.chr.sims | Hyperdivergent_Arm        | Hyperdivergent_Center     | 652 | 394 |                  | 0.17654 ns   |
| 0.2                | unswept.chr.sims | Hyperdivergent_Arm        | Hyperdivergent_Tip        | 652 | 120 | 1.00E-05         | ****         |
| 0.2                | unswept.chr.sims | Hyperdivergent_Arm        | Non-Hyperdivergent_Arm    | 652 | 630 |                  | 0.47818 ns   |
| 0.2                | unswept.chr.sims | Hyperdivergent_Arm        | Non-Hyperdivergent_Center | 652 | 416 |                  | 0.14027 ns   |
| 0.2                | unswept.chr.sims | Hyperdivergent_Arm        | Non-Hyperdivergent_Tip    | 652 | 104 | 0.03318          | *            |
| 0.2                | unswept.chr.sims | Hyperdivergent_Center     | Hyperdivergent_Tip        | 394 | 120 |                  | 0 ****       |
| 0.2                | unswept.chr.sims | Hyperdivergent_Center     | Non-Hyperdivergent_Arm    | 394 | 630 | 0.01998          | *            |
| 0.2                | unswept.chr.sims | Hyperdivergent_Center     | Non-Hyperdivergent_Center | 394 | 416 | 0.84406          | ns           |
| 0.2                | unswept.chr.sims | Hyperdivergent_Center     | Non-Hyperdivergent_Tip    | 394 | 104 | 0.00109          | **           |
| 0.2                | unswept.chr.sims | Hyperdivergent_Tip        | Non-Hyperdivergent_Arm    | 120 | 630 | 0.00028          | ****         |
| 0.2                | unswept.chr.sims | Hyperdivergent_Tip        | Non-Hyperdivergent_Center | 120 | 416 |                  | 0 ****       |
| 0.2                | unswept.chr.sims | Hyperdivergent_Tip        | Non-Hyperdivergent_Tip    | 120 | 104 | 0.47783          | ns           |
| 0.2                | unswept.chr.sims | Non-Hyperdivergent_Arm    | Non-Hyperdivergent_Center | 630 | 416 | 0.00892          | **           |
| 0.2                | unswept.chr.sims | Non-Hyperdivergent_Arm    | Non-Hyperdivergent_Tip    | 630 | 104 | 0.14043          | ns           |
| 0.2                | unswept.chr.sims | Non-Hyperdivergent_Center | Non-Hyperdivergent_Tip    | 416 | 104 | 0.00065          | ***          |
| 0.5                | swept.chr.sims   | Hyperdivergent_Arm        | Hyperdivergent_Center     | 626 | 342 | 2.00E-05         | ****         |
| 0.5                | swept.chr.sims   | Hyperdivergent_Arm        | Hyperdivergent_Tip        | 626 | 231 |                  | 1 ns         |
| 0.5                | swept.chr.sims   | Hyperdivergent_Arm        | Non-Hyperdivergent_Arm    | 626 | 635 |                  | 1 ns         |
| 0.5                | swept.chr.sims   | Hyperdivergent_Arm        | Non-Hyperdivergent_Center | 626 | 338 | 0.00027          | ***          |
| 0.5                | swept.chr.sims   | Hyperdivergent_Arm        | Non-Hyperdivergent_Tip    | 626 | 225 |                  | 1 ns         |
| 0.5                | swept.chr.sims   | Hyperdivergent_Center     | Hyperdivergent_Tip        | 342 | 231 | 0.00403          | **           |
| 0.5                | swept.chr.sims   | Hyperdivergent_Center     | Non-Hyperdivergent_Arm    | 342 | 635 | 3.00E-05         | ****         |
| 0.5                | swept.chr.sims   | Hyperdivergent_Center     | Non-Hyperdivergent_Center | 342 | 338 |                  | 1 ns         |
| 0.5                | swept.chr.sims   | Hyperdivergent_Center     | Non-Hyperdivergent_Tip    | 342 | 225 | 0.06213          | ns           |
| 0.5                | swept.chr.sims   | Hyperdivergent_Tip        | Non-Hyperdivergent_Arm    | 231 | 635 |                  | 1 ns         |
| 0.5                | swept.chr.sims   | Hyperdivergent_Tip        | Non-Hyperdivergent_Center | 231 | 338 | 0.02052          | *            |
| 0.5                | swept.chr.sims   | Hyperdivergent_Tip        | Non-Hyperdivergent_Tip    | 231 | 225 |                  | 1 ns         |
| 0.5                | swept.chr.sims   | Non-Hyperdivergent_Arm    | Non-Hyperdivergent_Center | 635 | 338 | 0.00051          | ***          |
| 0.5                | swept.chr.sims   | Non-Hyperdivergent_Arm    | Non-Hyperdivergent_Tip    | 635 | 225 |                  | 1 ns         |
| 0.5                | swept.chr.sims   | Non-Hyperdivergent_Center | Non-Hyperdivergent_Tip    | 338 | 225 | 0.20773          | ns           |
| 0.5                | unswept.chr.sims | Hyperdivergent_Arm        | Hyperdivergent_Center     | 666 | 405 | 0.01638          | *            |
| 0.5                | unswept.chr.sims | Hyperdivergent_Arm        | Hyperdivergent_Tip        | 666 | 123 |                  | 0 ****       |
| 0.5                | unswept.chr.sims | Hyperdivergent_Arm        | Non-Hyperdivergent_Arm    | 666 | 678 |                  | 1 ns         |
| 0.5                | unswept.chr.sims | Hyperdivergent_Arm        | Non-Hyperdivergent_Center | 666 | 415 | 0.0184           | *            |
| 0.5                | unswept.chr.sims | Hyperdivergent_Arm        | Non-Hyperdivergent_Tip    | 666 | 99  | 0.02587          | *            |
| 0.5                | unswept.chr.sims | Hyperdivergent_Center     | Hyperdivergent_Tip        | 405 | 123 | 0.02451          | *            |
| 0.5                | unswept.chr.sims | Hyperdivergent_Center     | Non-Hyperdivergent_Arm    | 405 | 678 | 0.02451          | *            |
| 0.5                | unswept.chr.sims | Hyperdivergent_Center     | Non-Hyperdivergent_Center | 405 | 415 |                  | 1 ns         |
| 0.5                | unswept.chr.sims | Hyperdivergent_Center     | Non-Hyperdivergent_Tip    | 405 | 99  |                  | 1 ns         |
| 0.5                | unswept.chr.sims | Hyperdivergent_Tip        | Non-Hyperdivergent_Arm    | 123 | 678 |                  | 0 ****       |
| 0.5                | unswept.chr.sims | Hyperdivergent_Tip        | Non-Hyperdivergent_Center | 123 | 415 | 0.02222          | *            |
| 0.5                | unswept.chr.sims | Hyperdivergent_Tip        | Non-Hyperdivergent_Tip    | 123 | 99  | 0.67914          | ns           |
| 0.5                | unswept.chr.sims | Non-Hyperdivergent_Arm    | Non-Hyperdivergent_Center | 678 | 415 | 0.02587          | *            |
| 0.5                | unswept.chr.sims | Non-Hyperdivergent_Arm    | Non-Hyperdivergent_Tip    | 678 | 99  | 0.03264          | *            |
| 0.5                | unswept.chr.sims | Non-Hyperdivergent_Center | Non-Hyperdivergent_Tip    | 415 | 99  |                  | 1 ns         |
| 0.8                | swept.chr.sims   | Hyperdivergent_Arm        | Hyperdivergent_Center     | 623 | 344 | 1.00E-05         | ****         |
| 0.8                | swept.chr.sims   | Hyperdivergent_Arm        | Hyperdivergent_Tip        | 623 | 232 |                  | 1 ns         |
| 0.8                | swept.chr.sims   | Hyperdivergent_Arm        | Non-Hyperdivergent_Arm    | 623 | 633 |                  | 1 ns         |
| 0.8                | swept.chr.sims   | Hyperdivergent_Arm        | Non-Hyperdivergent_Center | 623 | 338 |                  | 0 ****       |
| 0.8                | swept.chr.sims   | Hyperdivergent_Arm        | Non-Hyperdivergent_Tip    | 623 | 227 |                  | 1 ns         |
| 0.8                | swept.chr.sims   | Hyperdivergent_Center     | Hyperdivergent_Tip        | 344 | 232 | 0.00077          | ***          |
| 0.8                | swept.chr.sims   | Hyperdivergent_Center     | Non-Hyperdivergent_Arm    | 344 | 633 |                  | 0 ****       |
| 0.8                | swept.chr.sims   | Hyperdivergent_Center     | Non-Hyperdivergent_Center | 344 | 338 |                  | 1 ns         |
| 0.8                | swept.chr.sims   | Hyperdivergent_Center     | Non-Hyperdivergent_Tip    | 344 | 227 | 0.0196           | *            |
| 0.8                | swept.chr.sims   | Hyperdivergent_Tip        | Non-Hyperdivergent_Arm    | 232 | 633 |                  | 1 ns         |
| 0.8                | swept.chr.sims   | Hyperdivergent_Tip        | Non-Hyperdivergent_Center | 232 | 338 | 1.00E-04         | ***          |
| 0.8                | swept.chr.sims   | Hyperdivergent_Tip        | Non-Hyperdivergent_Tip    | 232 | 227 |                  | 1 ns         |
| 0.8                | swept.chr.sims   | Non-Hyperdivergent_Arm    | Non-Hyperdivergent_Center | 633 | 338 |                  | 0 ****       |
| 0.8                | swept.chr.sims   | Non-Hyperdivergent_Arm    | Non-Hyperdivergent_Tip    | 633 | 227 | 0.58038          | ns           |
| 0.8                | swept.chr.sims   | Non-Hyperdivergent_Center | Non-Hyperdivergent_Tip    | 338 | 227 | 0.004            | **           |
| 0.8                | unswept.chr.sims | Hyperdivergent_Arm        | Hyperdivergent_Center     | 697 | 402 | 1.00E-05         | ****         |
| 0.8                | unswept.chr.sims | Hyperdivergent_Arm        | Hyperdivergent_Tip        | 697 | 98  | 1.00E-05         | ****         |
| 0.8                | unswept.chr.sims | Hyperdivergent_Arm        | Non-Hyperdivergent_Arm    | 697 | 694 | 0.82137          | ns           |
| 0.8                | unswept.chr.sims | Hyperdivergent_Arm        | Non-Hyperdivergent_Center | 697 | 422 |                  | 0 ****       |
| 0.8                | unswept.chr.sims | Hyperdivergent_Arm        | Non-Hyperdivergent_Tip    | 697 | 78  | 0.5219           | ns           |
| 0.8                | unswept.chr.sims | Hyperdivergent_Center     | Hyperdivergent_Tip        | 402 | 98  | 0.28599          | ns           |
| 0.8                | unswept.chr.sims | Hyperdivergent_Center     | Non-Hyperdivergent_Arm    | 402 | 694 |                  | 0 ****       |
| 0.8                | unswept.chr.sims | Hyperdivergent_Center     | Non-Hyperdivergent_Center | 402 | 422 | 0.82137          | ns           |
| 0.8                | unswept.chr.sims | Hyperdivergent_Center     | Non-Hyperdivergent_Tip    | 402 | 78  | 0.82137          | ns           |
| 0.8                | unswept.chr.sims | Hyperdivergent_Tip        | Non-Hyperdivergent_Arm    | 98  | 694 |                  | 0 ****       |
| 0.8                | unswept.chr.sims | Hyperdivergent_Tip        | Non-Hyperdivergent_Center | 98  | 422 | 0.5219           | ns           |
| 0.8                | unswept.chr.sims | Hyperdivergent_Tip        | Non-Hyperdivergent_Tip    | 98  | 78  | 0.21659          | ns           |
| 0.8                | unswept.chr.sims | Non-Hyperdivergent_Arm    | Non-Hyperdivergent_Center | 694 | 422 |                  | 0 ****       |
| 0.8                | unswept.chr.sims | Non-Hyperdivergent_Arm    | Non-Hyperdivergent_Tip    | 694 | 78  | 0.20355          | ns           |
| 0.8                | unswept.chr.sims | Non-Hyperdivergent_Center | Non-Hyperdivergent_Tip    | 422 | 78  | 0.82137          | ns           |

Supplemental Table 8: Empirical FDR of mappings as a function of whether QTL were simulated in divergent regions and different chromosomal regions

| Strain Set       | Simulated Divergence | Simulated Chromosome Region | Group 1 | Group 2 | n1  | n2  | Adjusted p-value | Significance |
|------------------|----------------------|-----------------------------|---------|---------|-----|-----|------------------|--------------|
| unswept.chr.sims | Hyperdivergent       | Center                      | I       | II      | 105 | 100 | 0.01679          | *            |
| unswept.chr.sims | Hyperdivergent       | Center                      | II      | III     | 100 | 230 | 0.002            | **           |
| unswept.chr.sims | Hyperdivergent       | Center                      | III     | V       | 230 | 387 | 0.0051           | **           |
| unswept.chr.sims | Hyperdivergent       | Center                      | III     | X       | 230 | 220 | 0.00646          | **           |
| unswept.chr.sims | Hyperdivergent       | Tip                         | IV      | X       | 89  | 43  | 0.00446          | **           |
| unswept.chr.sims | Hyperdivergent       | Tip                         | V       | X       | 156 | 43  | 0.00749          | **           |
| swept.chr.sims   | Non-Hyperdivergent   | Arm                         | II      | V       | 488 | 233 | 0.04509          | *            |

Supplemental Table 9: Power to detect simulated QTL on different chromosomes, within hyperdivergent regions, historic recombination groups, and strain sets

| Strain Set       | Simulated Divergence | Simulated Chromosome Region | Group 1 | Group 2 | n1  | n2  | Adjusted p-value | Significance |
|------------------|----------------------|-----------------------------|---------|---------|-----|-----|------------------|--------------|
| swept.chr.sims   | Hyperdivergent       | Arm                         | I       | II      | 168 | 483 | 0.00007          | ****         |
| swept.chr.sims   | Hyperdivergent       | Arm                         | I       | III     | 168 | 359 | 0.00001          | ****         |
| swept.chr.sims   | Hyperdivergent       | Arm                         | I       | IV      | 168 | 360 | 0.00006          | ****         |
| swept.chr.sims   | Hyperdivergent       | Arm                         | I       | V       | 168 | 236 | 0.00002          | ****         |
| swept.chr.sims   | Hyperdivergent       | Arm                         | I       | X       | 168 | 247 | 0                | ****         |
| swept.chr.sims   | Hyperdivergent       | Arm                         | II      | X       | 483 | 247 | 0.00054          | ***          |
| swept.chr.sims   | Hyperdivergent       | Arm                         | III     | X       | 359 | 247 | 0.01327          | *            |
| swept.chr.sims   | Hyperdivergent       | Arm                         | IV      | X       | 360 | 247 | 0.00343          | **           |
| unswept.chr.sims | Hyperdivergent       | Arm                         | III     | X       | 343 | 269 | 0.03806          | *            |
| unswept.chr.sims | Hyperdivergent       | Center                      | I       | II      | 102 | 99  | 0.00015          | ***          |
| unswept.chr.sims | Hyperdivergent       | Center                      | I       | III     | 102 | 221 | 0                | ****         |
| unswept.chr.sims | Hyperdivergent       | Center                      | I       | V       | 102 | 383 | 0                | ****         |
| unswept.chr.sims | Hyperdivergent       | Center                      | I       | X       | 102 | 216 | 0.00015          | ***          |
| unswept.chr.sims | Hyperdivergent       | Center                      | III     | IV      | 221 | 180 | 0.0002           | ***          |
| unswept.chr.sims | Hyperdivergent       | Center                      | IV      | V       | 180 | 383 | 0.00085          | ***          |
| swept.chr.sims   | Hyperdivergent       | Tip                         | III     | IV      | 24  | 183 | 0.00191          | **           |
| swept.chr.sims   | Hyperdivergent       | Tip                         | III     | V       | 24  | 303 | 0.00099          | ***          |
| swept.chr.sims   | Hyperdivergent       | Tip                         | III     | X       | 24  | 145 | 0.00002          | ****         |
| unswept.chr.sims | Hyperdivergent       | Tip                         | I       | V       | 27  | 156 | 0.00523          | **           |
| unswept.chr.sims | Hyperdivergent       | Tip                         | III     | V       | 14  | 156 | 0.01308          | *            |
| swept.chr.sims   | Non-Hyperdivergent   | Arm                         | I       | II      | 190 | 488 | 0.02112          | *            |
| swept.chr.sims   | Non-Hyperdivergent   | Arm                         | I       | III     | 190 | 374 | 0.00002          | ****         |
| swept.chr.sims   | Non-Hyperdivergent   | Arm                         | I       | IV      | 190 | 376 | 0.00001          | ****         |
| swept.chr.sims   | Non-Hyperdivergent   | Arm                         | I       | V       | 190 | 232 | 0.00731          | **           |
| swept.chr.sims   | Non-Hyperdivergent   | Arm                         | I       | X       | 190 | 226 | 0                | ****         |
| swept.chr.sims   | Non-Hyperdivergent   | Arm                         | II      | X       | 488 | 226 | 0.00004          | ****         |
| swept.chr.sims   | Non-Hyperdivergent   | Arm                         | V       | X       | 232 | 226 | 0.01199          | *            |
| unswept.chr.sims | Non-Hyperdivergent   | Arm                         | I       | V       | 408 | 404 | 0.04823          | *            |
| unswept.chr.sims | Non-Hyperdivergent   | Arm                         | IV      | V       | 289 | 404 | 0.04823          | *            |
| swept.chr.sims   | Non-Hyperdivergent   | Center                      | I       | IV      | 15  | 114 | 0.04399          | *            |
| swept.chr.sims   | Non-Hyperdivergent   | Center                      | I       | X       | 15  | 321 | 0.01193          | *            |
| swept.chr.sims   | Non-Hyperdivergent   | Center                      | II      | X       | 216 | 321 | 0.00542          | **           |
| swept.chr.sims   | Non-Hyperdivergent   | Center                      | III     | X       | 155 | 321 | 0.00028          | ***          |
| unswept.chr.sims | Non-Hyperdivergent   | Center                      | I       | III     | 157 | 237 | 0.00608          | **           |
| unswept.chr.sims | Non-Hyperdivergent   | Center                      | I       | V       | 157 | 364 | 0.00018          | ***          |
| unswept.chr.sims | Non-Hyperdivergent   | Center                      | III     | X       | 237 | 185 | 0.00703          | **           |
| unswept.chr.sims | Non-Hyperdivergent   | Center                      | IV      | V       | 199 | 364 | 0.02493          | *            |
| unswept.chr.sims | Non-Hyperdivergent   | Center                      | V       | X       | 364 | 185 | 0.00018          | ***          |
| swept.chr.sims   | Non-Hyperdivergent   | Tip                         | I       | III     | 15  | 24  | 0.02849          | *            |
| swept.chr.sims   | Non-Hyperdivergent   | Tip                         | II      | III     | 63  | 24  | 0.00959          | **           |
| swept.chr.sims   | Non-Hyperdivergent   | Tip                         | III     | IV      | 24  | 176 | 0.02297          | *            |
| swept.chr.sims   | Non-Hyperdivergent   | Tip                         | III     | X       | 24  | 99  | 0.02148          | *            |

Supplemental Table 10: Empirical FDR of mappings as a function of whether QTL were simulated on different chromosomes, within hyper-divergent regions, historic recombination groups, and strain sets
